# Supplementary material for: High-precision EPMA measurement of trace elements in ilmenite and reference material development
Source: Royal Society of Chemistry journal article supplement (doi:10.1039/d2ja00238h), 2022-01-01
Supplement: d2ja00238h1.pdf [file d2ja00238h1.pdf]

**Supplementary Table S1.** Major element mass fractions (wt.%) of the PZH12-09 ilmenite determined using routine EPMA method.

**Supplementary Table S2.** Major (wt.%) and trace element ( $\mu\text{g/g}$ ) mass fractions of the PZH12-09 ilmenite determined using LA-ICP-MS.

**Supplementary Table S3.** Major element (wt.%) and trace element ( $\mu\text{g/g}$ ) mass fractions of the PZH12-09 ilmenite determined using SM ICP-MS.

**Supplementary Table S4.** Major and trace element composition ( $\mu\text{g/g}$ ) of the PZH12-09 ilmenite using high-precision EPMA method.

**Supplementary Fig. S1** Frequency distributions of trace elements determined by LA-ICP-MS, indicating normal distributions and demonstrating the homogeneity of the studied PZH12-09 ilmenite.
