# Supplementary material for: High-precision EPMA measurement of trace elements in ilmenite and reference material development
Source: Royal Society of Chemistry journal article supplement (doi:10.1039/d2ja00238h), 2022-01-01
Supplement: d2ja00238h3.xlsx [file d2ja00238h3.xlsx]

## Sheet: Sheet1
Supplementary Table S1. Major element mass fractions (wt.%) of the PZH12-09 ilmenite determined using the routine EPMA method.
Comment	MnO	MgO	FeO	TiO2	Comment	MnO	MgO	FeO	TiO2
IGGCAS-JXA 8100					IGGCAS-Cameca SXFive
PZH1-1	0.518	7.061	38.441	54.684	PZH@1-1	0.504	6.6507	38.64	53.2628
PZH1-2	0.535	6.886	37.951	54.018	PZH@1-2	0.5445	6.6907	37.6579	53.6242
PZH1-3	0.501	6.872	37.823	54.468	PZH@1-3	0.4935	7.1526	37.9953	53.7538
PZH1-4	0.53	6.947	37.986	54.499	PZH@1-4	0.5103	7.0466	37.3067	54.2929
PZH2-1	0.504	6.936	38.459	54.372	PZH@1-5	0.511	6.8986	38.2417	53.5139
PZH2-2	0.513	6.97	38.006	54.149	PZH@1-6	0.4949	6.8628	38.3964	52.8991
PZH2-3	0.49	6.841	38.121	52.704	PZH@1-7	0.4993	6.8942	37.9199	53.5438
PZH2-4	0.482	7.045	37.969	54.018	PZH@1-8	0.5007	6.6004	37.9411	53.7597
PZH3-1	0.503	6.943	37.947	54.181	PZH@1-9	0.521	6.892	38.784	53.382
PZH3-2	0.511	6.835	38.205	54.273	PZH@1-10	0.512	6.502	38.498	53.433
PZH3-3	0.485	6.984	37.82	53.309	PZH@1-11	0.504	6.652	38.637	53.261
PZH3-4	0.503	6.953	37.864	54.048	PZH@1-12	0.544	6.692	37.655	53.622
PZH4-1	0.515	7.177	38.004	53.666	PZH@1-13	0.493	7.054	37.993	53.752
PZH4-2	0.485	6.977	37.649	54.394	PZH@1-14	0.51	7.047	37.304	54.291
PZH4-3	0.51	6.973	37.888	54.164	PZH@1-15	0.511	6.899	38.239	53.512
PZH4-4	0.482	6.898	38.119	53.686	PZH@1-16	0.495	6.864	38.394	52.897
PZH5-1	0.49	6.994	38.198	53.901	PZH@1-17	0.499	6.895	37.917	53.542
PZH5-2	0.508	6.937	37.813	53.979	PZH@1-18	0.501	6.801	37.938	53.758
PZH5-3	0.509	7.18	38.273	53.871	PZH@1-19	0.507	7.1	38.406	52.922
PZH5-4	0.482	6.924	37.862	53.642	PZH@1-20	0.501	7.09	38.721	52.995
PZH6-1	0.517	6.835	38.064	53.401	PZH@1-21	0.494	7.089	38.909	52.951
PZH6-2	0.493	6.908	38.185	52.771	PZH@1-22	0.498	7.066	38.853	53.378
PZH6-3	0.492	6.932	38.122	52.831	PZH@1-23	0.491	7.103	38.909	52.902
PZH6-4	0.515	6.947	38.189	52.743	PZH@1-24	0.516	6.637	38.956	53.205
PZH7-1	0.509	6.705	38.049	53.752	PZH@1-25	0.511	7.039	38.404	53.358
PZH7-2	0.516	6.806	38.117	52.444	PZH@1-26	0.525	6.986	39.04	53.561
PZH7-3	0.481	6.957	38.098	53.249	PZH@1-27	0.518	6.666	38.879	53.932
PZH7-4	0.471	6.829	38.151	53.105	PZH@1-28	0.519	6.629	38.848	53.824
PZH8-1	0.495	6.978	38.439	52.537	PZH@1-29	0.497	7.082	38.823	53.048
PZH8-2	0.491	7.061	38.489	52.633	PZH@1-30	0.502	7.041	38.597	53.257
PZH8-3	0.526	6.771	38.306	53.735	Mean	0.507573	6.88742	38.3601	53.4478
PZH8-4	0.511	6.855	38.284	53.468	1 SD	0.0134894	0.190738	0.497812	0.383007
PZH9-1	0.488	6.931	38.239	52.93	RSD	2.65762	2.76936	1.29773	0.716601
PZH9-2	0.491	6.742	38.375	54.253
PZH9-3	0.511	6.873	38.334	52.888
PZH9-4	0.51	6.638	38.099	53.396
PZH10-1	0.486	6.789	38.442	52.993
PZH10-2	0.527	6.89	38.596	53.699
PZH10-3	0.514	6.842	38.386	53.174
PZH10-4	0.485	6.87	38.264	53.438
PZH11-1	0.502	6.842	38.553	53.869
PZH11-2	0.519	6.669	38.963	52.751
PZH11-3	0.544	6.772	38.981	53.511
PZH11-4	0.513	6.741	38.402	53.264
PZH12-1	0.499	6.61	38.717	53.048
PZH12-2	0.519	6.518	38.557	53.161
PZH12-3	0.48	6.661	38.997	53.191
PZH12-4	0.489	6.685	38.743	53.138
PZH13-1	0.486	6.636	38.691	53.24
PZH13-2	0.543	6.817	38.634	53.183
PZH13-3	0.458	6.593	38.798	53.547
PZH13-4	0.492	6.773	38.754	53.303
PZH14-1	0.546	6.701	38.701	53.681
PZH14-2	0.49	6.865	38.814	53.182
PZH14-3	0.487	6.544	38.789	53.516
PZH14-4	0.486	6.656	38.792	53.402
PZH15-1	0.481	6.602	38.641	53.411
PZH15-2	0.489	6.821	38.487	53.869
PZH15-3	0.496	6.6	38.929	53.12
PZH15-4	0.493	6.582	38.441	53.352
PZH16-1	0.512	6.787	38.237	54.377
PZH16-2	0.519	6.562	38.318	53.307
PZH16-3	0.528	6.604	38.589	53.532
PZH16-4	0.494	6.855	38.422	53.058
PZH17-1	0.511	6.62	38.623	54.274
PZH17-2	0.465	6.699	38.276	53.912
PZH17-3	0.507	6.68	38.37	54.161
PZH17-4	0.512	6.701	38.348	54.285
PZH18-1	0.481	6.791	38.083	53.956
PZH18-2	0.517	6.635	38.384	54.079
PZH18-3	0.493	7.206	38.485	54.222
PZH18-4	0.516	6.518	38.193	53.826
PZH19-1	0.51	6.528	38.444	53.871
PZH19-2	0.492	6.852	38.296	54.074
PZH19-3	0.491	6.682	38.245	54.403
PZH19-4	0.501	6.566	38.468	53.618
PZH20-1	0.469	6.796	38.378	54.182
PZH20-2	0.525	6.71	38.601	54.093
PZH20-3	0.502	6.83	38.466	54.072
PZH20-4	0.5	6.801	38.114	54.183
PZH21-1	0.495	7.148	38.355	54.063
PZH21-2	0.474	7.058	38.436	53.543
PZH21-3	0.516	7.055	38.084	53.828
PZH21-4	0.483	6.983	38.359	54.168
PZH22-1	0.49	7.196	38.187	53.843
PZH22-2	0.506	7.088	38.05	53.614
PZH22-3	0.502	7.143	38.253	53.759
PZH22-4	0.514	7.094	38.366	54.124
PZH23-1	0.506	7.043	38.205	54.217
PZH23-2	0.505	7.087	37.914	53.787
PZH23-3	0.522	7.011	37.706	53.538
PZH23-4	0.487	7.041	38.12	54.033
PZH24-1	0.487	7.047	37.942	54.011
PZH24-2	0.524	7.127	38.094	53.768
PZH24-3	0.505	7.118	37.8	53.438
PZH24-4	0.494	7.125	38.083	53.48
PZH25-1	0.563	7.126	38.283	53.915
PZH25-2	0.512	6.997	37.903	54.209
PZH25-3	0.546	7.121	37.855	53.969
PZH25-4	0.504	6.984	37.824	53.702
PZH26-1	0.509	7.049	38.11	53.552
PZH26-2	0.543	6.907	37.877	53.823
PZH26-3	0.527	7.035	38.132	53.953
PZH26-4	0.517	7.028	38.162	53.294
PZH27-1	0.514	7.034	38.151	53.311
PZH27-2	0.504	7.184	38.168	53.511
PZH27-3	0.479	7.043	38.178	53.882
PZH27-4	0.491	7.048	37.757	53.879
PZH28-1	0.479	7.048	38.284	53.887
PZH28-2	0.541	6.853	38.05	53.709
PZH28-3	0.498	7.045	37.878	53.843
PZH28-4	0.511	7.041	37.859	53.752
PZH29-1	0.499	7.045	37.926	54.46
PZH29-2	0.492	7.08	37.809	53.897
PZH29-3	0.486	7.213	37.715	53.688
PZH29-4	0.523	7.013	37.659	54.604
PZH30-1	0.504	7.016	37.576	53.83
PZH30-2	0.51	6.986	37.466	54.193
PZH30-3	0.499	7.04	37.401	54.402
PZH30-4	0.482	7.055	37.232	54.501
PZH31-1	0.472	7.189	37.542	54.293
PZH31-2	0.494	6.934	37.393	53.843
PZH31-3	0.51	7.031	37.162	53.332
PZH31-4	0.477	7.072	37.715	52.556
PZH32-1	0.506	6.939	37.24	53.889
PZH32-2	0.496	6.937	37.256	53.751
PZH32-3	0.556	6.949	37.414	53.707
PZH32-4	0.526	6.952	37.184	53.949
PZH33-1	0.486	7.052	37.26	53.04
PZH33-2	0.506	6.99	37.405	53.102
PZH33-3	0.5	6.943	37.517	53.677
PZH33-4	0.51	7.017	37.156	53.913
PZH34-1	0.505	6.9776	37.261	53.514
PZH34-2	0.472	6.923	37.367	53.71
PZH34-3	0.503	6.918	37.461	53.605
PZH34-4	0.528	6.973	37.285	53.919
PZH35-1	0.505	6.955	37.376	53.37
PZH35-2	0.493	7.077	37.803	53.361
PZH35-3	0.511	6.92	37.432	53.266
PZH35-4	0.491	6.934	37.457	52.873
PZH36-1	0.518	6.92	38.464	52.814
PZH36-2	0.546	6.995	38.417	54.026
PZH36-3	0.549	6.671	38.493	54.029
PZH36-4	0.501	6.748	38.494	53.614
PZH37-1	0.486	6.824	38.463	53.406
PZH37-2	0.532	6.878	38.835	54.037
PZH37-3	0.528	6.685	38.266	53.476
PZH37-4	0.52	6.84	38.68	53.327
PZH38-1	0.507	6.794	38.782	53.606
PZH38-2	0.491	6.809	38.812	53.332
PZH38-3	0.502	6.797	38.729	54.235
PZH38-4	0.5	6.743	38.547	54.158
PZH39-1	0.487	6.897	38.693	54.195
PZH39-2	0.498	7.053	38.119	54.287
PZH39-3	0.515	6.692	38.497	53.984
PZH39-4	0.496	6.756	38.661	53.338
PZH40-1	0.493	6.734	38.514	53.531
PZH40-2	0.497	6.769	38.509	53.426
PZH40-3	0.535	6.917	38.662	54.061
PZH40-4	0.543	6.824	38.46	54.049
PZH41-1	0.498	6.733	38.48	53.832
PZH41-2	0.51	6.872	38.55	53.537
PZH41-3	0.507	6.984	38.348	53.516
PZH41-4	0.487	6.827	38.499	53.809
PZH42-1	0.487	6.886	38.525	53.489
PZH42-2	0.487	6.873	38.397	53.477
PZH42-3	0.512	6.825	38.43	53.639
PZH42-4	0.488	6.829	38.417	53.471
PZH43-1	0.529	6.663	38.779	53.851
PZH43-2	0.502	6.688	38.531	53.465
PZH43-3	0.505	6.583	38.406	53.551
PZH43-4	0.479	6.76	38.631	53.622
PZH44-1	0.491	6.689	38.324	53.506
PZH44-2	0.497	6.687	38.6	53.18
PZH44-3	0.519	6.72	38.65	53.773
PZH44-4	0.525	6.612	38.56	53.412
PZH45-1	0.497	6.755	38.648	53.575
PZH45-2	0.476	6.738	38.636	53.633
PZH45-3	0.51	6.745	38.481	53.855
PZH45-4	0.481	6.689	38.792	53.376
PZH46-1	0.505	6.884	37.784	53.299
PZH46-2	0.495	7.059	37.676	53.306
PZH46-3	0.506	6.802	37.601	53.383
PZH46-4	0.499	6.986	37.925	52.721
PZH47-1	0.509	6.944	37.771	53.286
PZH47-2	0.493	7.051	37.922	54.127
PZH47-3	0.491	6.966	37.882	54.132
PZH47-4	0.509	6.974	37.55	53.331
PZH48-1	0.5	6.776	38.195	53.529
PZH48-2	0.516	6.893	37.95	54.208
PZH48-3	0.501	6.84	38.649	53.066
PZH48-4	0.518	6.923	38.486	53.683
PZH49-1	0.504	6.823	38.254	53.402
PZH49-2	0.512	6.778	38.181	53.225
PZH49-3	0.47	7.2	38.338	53.914
PZH49-4	0.494	7.026	38.461	53.707
PZH50-1	0.492	6.987	38.324	53.374
PZH50-2	0.566	6.715	38.044	53.77
PZH50-3	0.555	6.939	38.312	53.54
PZH50-4	0.499	6.908	38.727	53.188
Mean	0.503985	6.88309	38.1903	53.6602
1 SD	0.0189417	0.163094	0.424889	0.446828
RSD	3.75839	2.36948	1.11256	0.832699
SD, standard deviation; RSD, relative standard deviation.
