# Supplementary material for: High-precision EPMA measurement of trace elements in ilmenite and reference material development
Source: Royal Society of Chemistry journal article supplement (doi:10.1039/d2ja00238h), 2022-01-01
Supplement: d2ja00238h4.xlsx [file d2ja00238h4.xlsx]

## Sheet: S2-1
Supplementary Table S2-1. Major (wt.%）and trace element (μg/g) mass fractions of the PZH12-09 ilmenite determined using LA-ICP-MS.
	Comment	MnO	MgO	TiO2	Al	Sc	V	Cr	Co	Ni	Zr	Nb	Hf	Ta
IGGCAS-SKLLE (n=45)	1-1	0.464189	7.16225	55.8593	443.84	37.12	230.5	21.61	99.51	27.09	90.42	30.35	2.64	2.86
	1-2	0.471893	6.93258	55.6683	484.73	37.12	249.81	18.47	113.59	25.72	80.47	28.38	2.24	2.64
	1-3	0.427243	6.95108	54.848	476.4	38.48	244.24	19.87	100.86	25.31	86.31	30.85	2.26	2.8
	2-1	0.479096	6.6839	54.7214	400.95	34.42	239.32	19.29	104.83	26.38	86.85	32.24	2.31	3.27
	2-2	0.472861	6.60442	55.0238	436.56	37.98	240.34	19.39	102.74	26.83	74.4	27.99	2.25	2.92
	2-3	0.469493	6.57849	52.8109	491.42	38.54	239.62	18.83	98.96	25.49	81.92	28.71	1.81	2.84
	3-1	0.490486	6.89233	55.412	447.69	34.487	265.21	19.34	97.56	25.18	87.84	30.08	2.25	2.85
	3-2	0.419526	7.0473	55.2462	499.69	32.52	229.83	22.23	107.45	25.84	80.79	29.24	2.21	2.75
	3-3	0.450987	7.21371	55.0473	409.43	39.12	272.83	21.19	105.83	27.8	82.67	29.5	1.97	2.93
	4-1	0.433726	6.69506	54.9541	461.56	34.51	258.02	21.43	96.37	26.55	82.51	28.35	2.19	2.37
	4-2	0.517959	7.11254	54.1242	337.532	39.52	259.63	20.49	110.34	26.77	89.32	32.15	2.03	2.95
	4-3	0.496521	6.87105	53.2149	457.133	37.69	244.36	24.16	88.66	25.39	85.16	28.66	1.94	2.86
	5-1	0.530249	6.90038	53.189	471.673	39.44	276.11	23.75	103.67	25.78	84.33	27.1	2.26	3.16
	5-2	0.438464	6.67803	54.8092	388.429	36.55	249.23	19.44	89.52	28.61	76.1	30.69	1.86	3.34
	5-3	0.471755	6.67183	56.6919	433.605	37.43	250.17	21.68	96.77	29.44	80.4	31.37	2.25	2.75
	6-1	0.514834	6.81081	53.1547	474.357	35.44	248.68	20.07	86.69	25.17	78.65	28.19	2.04	2.91
	6-2	0.498713	6.83106	55.4107	471.332	40.31	284.66	19.67	95.11	28.61	80.39	34.15	2.07	3.05
	6-3	0.509168	6.6931	54.7214	403.413	38.59	276.38	22.36	94.89	30.47	91.72	32.7	1.99	3.11
	7-1	0.497172	7.03559	53.6501	472.716	34.28	228.79	20.59	106.78	24.5	86.43	31.14	1.86	3.08
	7-2	0.479144	6.66721	53.2149	386.72	34.09	265.31	23.48	92.73	26.63	88.24	31.87	1.92	2.75
	7-3	0.477589	7.27854	55.5615	369.034	39.8776	234.917	20.2607	108.7	28.512	88.8027	32.576	2.30023	2.91595
	8-1	0.504384	6.96553	55.4746	371.2	32.1985	263.221	17.903	108.128	21.2985	82.8027	33.7464	2.34002	2.90112
	8-2	0.502465	6.8554	55.2609	369.077	34.916	254.093	23.5775	105.362	31.8858	81.9139	32.1842	2.30511	2.95551
	8-3	0.497066	6.57411	55.6414	379.1	34.6535	237.82	22.2251	105.125	24.6207	77.0221	31.749	2.25069	3.3585
	9-1	0.497072	6.73272	55.266	454.856	35.8099	236.169	21.1218	106.713	19.4575	87.4188	32.8402	2.31625	3.0272
	9-2	0.482862	7.15862	54.4114	390.271	36.8835	255.619	23.4712	109.577	27.2754	87.6344	33.2479	2.44599	3.10409
	9-3	0.488094	7.04777	55.3498	358.542	35.634	226.122	25.1354	109.51	19.0735	84.0517	32.2629	2.41335	2.8691
	10-1	0.493594	7.02751	54.8836	381.302	36.2909	219.288	20.7097	102.701	20.7631	84.0473	30.1154	2.30129	2.75515
	10-2	0.535295	7.01306	55.9092	420.448	31.0473	224.424	17.6601	98.0298	25.3098	80.2499	28.9277	2.15907	2.42361
	10-3	0.508404	6.84634	55.2748	495.728	34.8728	244.697	23.0584	102.299	23.8934	89.7256	31.2056	2.32473	2.8399
	11-1	0.479575	6.82329	54.1242	465.72	33.3838	259.806	20.723	101.904	19.3384	80.6265	33.5996	2.50878	3.08969
	11-2	0.484624	6.93141	55.0709	493.086	33.8381	230.061	22.9023	100.442	26.3542	82.4348	33.1263	2.30814	3.15274
	11-3	0.510042	6.38574	54.517	469.85	31.7635	222.517	25.169	99.3343	26.8341	77.0056	30.5211	2.14722	2.6346
	12-1	0.474722	6.28288	54.2419	409.91	36.9859	260.69	22.9707	90.1576	24.1406	90.6657	33.0397	2.30656	2.97468
	12-2	0.469975	6.49072	53.6501	360.232	35.9582	240.642	22.1555	105.416	25.7825	89.9909	32.9856	2.45353	3.17504
	12-3	0.485733	6.46927	53.2463	417.391	32.2836	207.142	17.6697	99.4397	27.235	80.5854	30.6926	2.21899	2.84448
	13-1	0.485384	6.37432	53.7375	420.743	36.8448	216.291	19.3854	103.11	27.9357	87.3474	30.1726	2.19313	2.77391
	13-2	0.473568	7.30962	53.2149	456.88	38.2123	205.223	20.4656	96.7537	22.1171	89.6262	30.5979	2.2226	2.77614
	13-3	0.50045	6.48621	53.017	469.65	31.8525	244.144	21.8975	87.3489	24.794	77.9238	30.0232	2.03818	2.70885
	14-1	0.491333	6.84143	52.446	441.49	35.1021	255.234	24.3989	102.512	24.1856	87.1834	31.8746	2.17069	2.90767
	14-2	0.468053	6.85837	52.6341	362.413	37.707	240.745	20.3286	103.259	29.072	90.9143	31.8901	2.42508	2.83052
	14-3	0.515271	6.47074	54.2993	393.019	32.3273	202.124	24.9078	91.3279	31.7706	81.644	29.4925	2.57688	2.61484
	15-1	0.486713	6.84707	53.0326	455.474	33.9164	212.832	20.782	98.8399	29.5468	84.1962	29.2415	2.1649	2.41358
	15-2	0.47186	6.64245	52.4159	443.174	33.5486	225.784	18.9565	99.0548	31.3214	82.7442	31.4368	2.08739	2.84653
	15-3	0.483856	6.93372	53.189	469.855	30.5711	232.638	19.4557	101.59	26.8464	74.7839	31.141	2.09014	3.03277
Mean		0.484477	6.8151	54.392	430.392	35.647	242.34	21.214	100.655	26.065	83.9169	30.9422	2.20931	2.89147
1 SD		0.0247152	0.248074	1.09315	44.752	2.55535	19.555	2.04583	6.48513	3.03213	4.66238	1.75633	0.186986	0.219637
RSD		5.10143	3.64007	2.00976	10.398	7.16847	8.06925	9.64375	6.44291	11.633	5.55595	5.67615	8.46355	7.59603
IGGCAS-FIL (n=45)	16-1	0.498163	6.47101	53.1095	466.68	30.7018	243.047	20.6567	95.884	28.0157	76.3948	32.8383	2.31004	3.03157
	16-2	0.473357	6.35253	53.2603	337.532	35.4507	244.083	19.5313	99.0728	22.0696	85.2728	32.1584	2.35088	2.87573
	16-3	0.471598	6.32697	53.9996	457.133	36.4842	196.895	18.8295	92.3416	27.8928	73.3521	32.3301	2.20911	2.92057
	17-1	0.489033	6.35723	53.9749	471.673	33.6416	222.578	18.7079	97.4278	26.8141	85.272	29.863	2.20093	2.6197
	17-2	0.4738	6.26069	53.4293	388.429	33.3571	230.873	22.0315	101.911	26.3545	79.3556	30.0225	2.16322	2.62252
	17-3	0.483693	6.57148	54.2644	433.605	35.0805	221.989	20.854	96.7885	33.4042	79.8181	31.4365	2.08994	2.9409
	18-1	0.464978	6.63237	54.3994	474.357	34.3379	234.62	17.3578	103.956	23.1321	78.2128	32.6475	2.37606	3.13324
	18-2	0.519327	6.70599	54.8092	471.332	30.196	269.723	16.2006	90.373	30.7489	72.8109	29.7823	1.9757	2.58935
	18-3	0.468594	6.53248	55.3875	403.413	35.7612	214.719	19.5206	97.5473	27.8623	82.991	30.2994	2.23583	2.80234
	19-1	0.457923	6.54219	55.4908	427.476	35.2116	235.126	16.8888	100.709	23.2593	85.2387	31.9951	2.13234	2.86049
	19-2	0.470396	6.34162	56.1072	362.705	32.2148	201.324	22.3773	92.386	26.6639	78.0715	30.1458	2.23199	2.65691
	19-3	0.46784	6.41095	55.8294	454.468	32.8805	190.589	19.5421	91.3086	33.5661	78.6	28.8735	2.12806	2.72736
	20-1	0.469855	6.6873	56.6919	412.316	33.8713	191.076	17.0635	101.198	29.9352	80.9619	30.4006	2.23179	2.62717
	20-2	0.444894	7.22113	56.4752	442.764	36.8747	225.871	19.7008	97.5229	24.463	84.5791	30.4509	2.07493	2.91846
	20-3	0.465248	6.20221	57.6946	454.756	32.9396	245.978	17.5481	96.9146	32.5378	83.508	30.6775	2.25962	2.88832
	21-1	0.498618	6.78531	54.6135	483.159	31.2806	216.647	18.3497	93.8204	25.6069	75.2999	30.7965	2.27631	2.90387
	21-2	0.469656	6.42081	53.7325	438.344	34.8083	204.854	18.1717	106.889	23.0283	84.6071	30.4452	2.32435	2.8621
	21-3	0.477009	6.49556	52.925	412.484	29.9139	218.207	19.7752	110.61	24.8538	74.6385	32.6742	2.40657	3.11734
	22-1	0.4574	6.45401	52.0909	419.903	33.801	251.83	19.5029	107.542	25.5671	87.7705	31.8062	2.41434	3.16108
	22-2	0.453859	6.6649	52.318	413.011	34.1618	218.014	19.2672	99.3023	24.212	79.8977	30.8894	2.23928	2.98967
	22-3	0.464066	6.49453	52.4659	368.756	33.9875	248.893	19.4505	97.1087	32.5082	82.0278	29.124	2.17469	2.54957
	23-1	0.435032	7.01485	51.364	459.458	35.3459	218.289	19.0158	97.3924	26.3202	86.6375	31.496	2.11585	2.81432
	23-2	0.459583	6.50702	51.1556	472.716	34.1883	209.803	20.2981	105.629	24.7015	81.5644	30.3644	2.12086	2.98486
	23-3	0.503668	6.95016	50.7288	386.72	31.3426	223.473	22.2315	91.5245	25.4023	79.4608	28.555	2.11688	2.46869
	24-1	0.458152	6.37764	51.8688	369.034	33.6201	186.273	21.3589	95.41	31.0009	80.4956	29.7314	2.11341	2.5983
	24-2	0.479413	6.91539	51.9698	371.76	29.5421	236.264	20.2848	96.3809	28.9694	75.072	29.8831	2.47035	2.7031
	24-3	0.4507	6.12622	51.1642	371.357	36.4425	241.707	21.1632	95.6821	23.1047	85.7313	30.7502	2.29913	2.82969
	25-1	0.439112	6.29908	52.3866	377.425	36.274	201.897	23.3793	97.2369	28.4659	79.8489	29.7031	2.20792	2.67578
	25-2	0.460965	7.11026	52.9669	444.94	33.4559	211.439	24.9586	99.7855	29.5636	83.9612	30.0623	2.23461	2.7643
	25-3	0.450548	7.06734	53.1547	308.31	33.454	228.706	18.3592	96.9328	28.5021	84.7708	30.7729	2.17952	2.74782
	26-1	0.453148	6.85638	52.7336	517.111	33.1642	252.013	22.4563	97.5841	20.0972	84.6838	30.989	2.26568	3.02071
	26-2	0.447458	6.86421	53.6354	449.299	30.8237	211.963	19.6232	97.3753	28.7279	82.5851	29.943	2.16748	2.84946
	26-3	0.456958	6.6781	54.0113	482.969	31.3702	195.25	18.8178	99.6701	23.5831	79.1082	30.4153	2.18773	2.82618
	27-1	0.438998	6.6934	54.364	410.257	35.2882	182.409	24.3823	94.5025	30.2824	84.3186	29.1068	2.11392	2.57513
	27-2	0.422192	6.70995	54.5414	364.121	34.6968	189.934	21.7883	97.516	27.9862	79.5372	29.848	2.15861	2.78988
	27-3	0.444205	7.05489	55.134	437.242	30.2632	192.75	22.6358	95.9128	24.1893	80.1472	29.5441	2.15055	2.6967
	28-1	0.454676	6.86677	56.2081	488.788	31.7217	210.904	21.9411	90.791	33.4279	80.9859	27.7671	2.08854	2.2869
	28-2	0.45128	6.20849	55.3853	407.131	32.8652	197.186	17.7501	99.3203	31.4944	81.6746	30.4503	2.11867	2.80285
	28-3	0.449119	7.15416	55.6769	501.412	34.8377	196.987	19.7789	98.9295	25.7447	84.1032	29.9593	2.17852	2.72769
	29-1	0.439817	7.09768	55.2628	353.359	32.3343	209.212	19.9341	97.1257	29.6466	79.8169	29.7442	2.11355	2.59037
	29-2	0.430989	7.03866	55.4107	462.447	33.1493	230.176	17.8103	101.545	30.3345	82.1795	30.2856	2.13938	2.78277
	29-3	0.487989	6.36144	56.8517	557.51	29.1928	238.686	24.8512	92.1578	30.6997	75.0751	28.7829	2.00274	2.4493
	30-1	0.464252	6.65047	57.5157	436.056	32.9748	215.734	20.1877	96.9005	26.6821	77.2218	31.3027	2.20151	2.81423
	30-2	0.428669	6.19971	55.9962	415.075	35.1137	250.947	24.4088	102.21	31.4218	85.8902	31.4682	2.35427	3.17992
	30-3	0.46427	6.48053	53.9866	363.757	32.9876	224.546	19.8753	98.1255	33.8128	82.0657	29.5451	2.03263	2.66236
Mean		0.462456	6.62698	54.1454	426.723	33.3646	219.633	20.1915	97.9167	27.7035	81.0137	30.4473	2.19863	2.78755
1 RD		0.0203956	0.297869	1.77698	51.5542	1.97758	21.0492	2.1724	4.40515	3.49604	3.7598	1.12943	0.109212	0.194157
RSD		4.41028	4.4948	3.28186	12.0814	5.92719	9.58379	10.759	4.49888	12.6195	4.64094	3.70945	4.96729	6.96517
RD, standard deviation; RSD, relative standard deviation.

## Sheet: S2-2
Supplementary Table S2-2. Major and trace element (μg/g) mass fractions of the glass reference materials determined using LA-ICP-MS.
	Reference	Li7	Be9	B11	Na23	Mg25	Al27	Si29	P31	K39	Ca43	Sc45	Ti49	V51	Cr53	Mn55	Co59	Ni60	Cu63	Zn66	Ga71	Rb85	Sr88	Y89	Zr90	Nb93	Mo98	Cd111	Sn118	Sb121	Cs133	Ba137	La139	Ce140	Pr141	Nd146	Sm147	Eu151	Gd158	Tb159	Dy163	Ho165	Er166	Tm169	Yb173	Lu175	Hf177	Ta181	W182
IGGCAS-SKLLE (n=10)	610	476.38	536.72	344.36	101350	422.64	11063	327206	447.9	459.34	85833.8	464.35	479.85	442.49	425.71	393	417.68	465.03	427.38	452.93	439.62	401.54	512.82	476.4	465.53	474.3	401.49	266.27	408.56	377.98	349.42	447.48	458.4	449	471.71	445.62	470.03	460.59	479.35	464.82	465.36	482.32	485.33	462.96	474.98	466.62	458.34	465.76	412.42
	610	444.58	475.4	295.54	94156.1	491.98	10260.2	303036	396.84	427.21	80769.4	445.23	462.98	430.56	403.79	374.3	398.67	434.01	418.34	423.28	428.13	388.23	505.58	470.94	458.21	461.78	390.54	252.31	400.34	364.8	332.97	443.28	446.24	442.09	457.36	439.99	458.56	444.52	461.25	452.96	457.1	466.68	472.79	453.28	465.8	449.91	444.32	451.43	404.09
	610	429.37	469.13	314.25	89187.2	470.22	9778.57	290713	358.24	407.27	77290.9	424.73	427.75	409.44	345.95	357.35	373.23	411.15	427.44	400.88	406.17	369.94	477.72	445.12	431.6	434.67	346.78	222.18	382.13	347.71	313.87	411.04	424.7	425.05	435.73	419.6	441.61	430.19	438.51	431.94	435.13	450.8	452.08	435.83	443.89	437.47	435.73	434.13	376.05
	610	466.81	503.71	306.32	99605.4	414.08	10770.1	315040	411.49	452.98	84208	472.01	485.03	450.44	415.71	397.04	420.71	457.87	444.64	448.75	449.95	407.05	531.47	495.46	479.46	486.37	407.08	252.98	423.37	384.44	355.95	466.37	470.1	465.04	483.24	467.18	491	471.68	493.1	483.19	483.68	498.31	505.17	483.72	486.4	485.68	483.02	483.57	426.88
	610	439.47	478.61	329.82	93949.6	480.57	10082.6	300578	397.03	429.87	82460.6	445.71	472.72	428.61	371.7	378.54	400.76	437.24	462.47	427.69	435.33	395.32	513.31	476.45	463.63	466.21	378.19	244.31	409.25	363.19	337.32	444.19	459.27	453.51	468.96	447.46	477.32	455.8	472.57	476.25	462.9	483.39	488.78	465.09	481.89	467.49	461.1	463.54	410.95
	610	431.49	468.12	283.91	91789.4	461.04	9826.41	289263	390.58	414.49	79433	429.28	456.96	421.57	397.71	366.89	389.01	418.05	413.2	425.37	425.87	382.41	497.73	462.46	446.3	453.89	388.8	248.16	397.66	363.22	338.41	439.4	438.06	438.41	450.75	432.68	455.21	441.61	455.95	453.9	453.45	470.53	465.89	445.85	461.18	450.81	453.46	452.06	400.23
	610	452.88	496.78	324.16	96938.3	500.32	10503.7	308411	409.4	442.51	85394.2	455.33	463.3	440.09	421.06	382.84	409.52	438.63	420.61	443.99	443.8	406.35	524.39	491.16	474.82	479.05	403.26	255.15	419.19	377.23	348.42	463.68	467.17	463.9	479.32	460.29	483.23	470.39	484.29	475.61	479.46	500.71	500.26	476.61	488.05	481.83	472.33	478.29	419.8
	610	442.36	480.81	283.65	93803.3	479.66	10173.7	299952	397.99	435.26	82297.6	456.42	459.13	434.68	416.01	382.49	403.17	437.95	432.32	430.05	439.44	402.83	517.63	488.29	469.16	476.29	398.21	264.05	416.4	382.58	347.91	452.03	458.53	457.18	467.02	449.36	479.39	462.78	476.81	475.94	475.8	489.89	491.74	468.29	487	471.18	471.72	471.73	416.96
	610	484.3	535.87	332.27	100617	525.47	10965.5	326395	407.95	468.21	89003.5	477.92	494.99	466.31	445.45	408.21	427.06	465.38	447.43	456.86	463.57	413.06	546.48	511.62	493.9	498.41	426.11	267.59	429.38	396.63	361.48	476.32	478.05	479.79	491.96	476.67	502.97	484.19	502.35	499.2	499.01	513.67	516.51	489.77	505.67	491.77	492.51	490.48	440.98
	610	456.39	475.91	325.08	93882.1	466.88	10026.9	304876	388.76	419.09	82018.8	440.95	456.55	430.91	416.43	373.6	399.18	432.67	386.33	428.87	439.36	385.79	511.88	472.26	458.49	461.09	399.43	260.3	404.4	368.56	354.45	439.17	447.87	438.59	457.73	436.94	466.82	448.57	464.97	462.23	455.68	479.11	471.02	452.91	467.94	456.91	461.61	454.23	409.86
IGGCAS-FIL (n=10)	610	473.08	501.07	284.47	100250	499.24	10720.5	318678	406.42	452.85	86962.2	468.67	470.79	455.3	412.16	400.48	427.91	463.95	471.64	442.01	459.4	411.57	531.7	500.16	487.4	488.6	401.55	258.39	427.59	389.3	353.39	466.34	473.2	469.1	486.44	465.62	493.22	472.91	494.76	485.15	491.91	502.3	499.45	476.68	498.03	484.18	484.23	484.54	426.89
	610	503.3	565.13	290.04	106587	446.73	11367.5	341039	441.43	482.45	91133.7	501.34	515.24	481.36	418.75	424.03	453.31	482.12	510.38	478.82	491.65	431.45	560.06	525.64	513.5	513.03	422.88	267	456.28	412.99	374.6	489.41	493.17	494.85	506.41	488.29	518.7	503.04	524.06	504.64	518.72	526.02	530.16	505.07	520.07	507.99	510.52	509.03	449.58
	610	502.56	533.7	352.62	105557	440.47	11268.7	340479	439.24	474.38	91401.5	493.66	477.6	474.46	456.55	417.12	444.85	475.32	448.27	475.88	484.77	426.55	559.23	525.34	505.51	502.59	438.79	289.71	448.21	407.09	381.81	486.24	491.46	484.66	501.25	489.43	519.31	495.05	514.36	509.91	507.53	522.46	523.44	501.19	521.28	508.17	508.63	507.8	453.92
	610	438.77	486.94	315.44	93510.4	479.43	10346.2	302237	405.88	425.76	78589.8	429.97	444.69	418.84	395.62	365.22	394.13	421.36	375.27	410.67	427.07	372.55	480.69	451.78	435.15	447.61	385.19	257.79	397.03	359.98	330.85	416.71	421.86	418.11	436.8	423.26	446.49	424.93	438	436.27	433.83	446.9	450.62	432.92	444.07	433.14	430.47	437.65	388.74
	610	403.68	440.99	314.54	86614.8	442.55	9390.86	279023	359.45	401.91	74973.9	407.52	421.55	397.85	372.74	350.67	373.68	400.7	386.87	397.99	402.56	366.1	466.95	441.16	422.71	431.82	366.6	233.12	383.07	341.33	317.56	411.65	412.11	411.09	424.3	411.23	429.42	414.77	429.76	427.57	425.92	438.24	440.88	420.82	429.03	425.15	429.76	428.17	377.18
	610	487.69	531.54	341.12	104668	440.06	11096.2	329453	421.4	468	87923.2	477.37	504.77	469.45	461.61	410.42	447.99	472.77	426.34	468.46	480.71	433.07	552.83	512.5	499.04	500.42	441.42	296.46	451.92	413.1	394.77	480.34	491.47	483.08	499.04	482.78	509.22	488.14	512.45	501.58	497.66	514.8	514.95	496.19	503.11	492.98	492.51	500.56	449.75
	610	439.22	485.77	309	95384.9	485.33	9993.75	302708	394.29	436.31	79485.3	440.32	441.28	426.46	409.62	376.2	397	428.59	397.69	429.63	432.59	391.28	502.63	457.47	446.99	454.23	396.6	259.22	405.16	377.1	345.83	438.31	441.17	439.05	451.53	437.47	460.79	438.17	452.42	451.54	451.15	466.03	466.2	448.18	455.91	450.03	452.85	456.4	412.66
	610	453.59	478.18	319.09	96101	499	10028.2	307451	389.93	437.92	80917.7	448.13	467.77	434.59	414.54	383.17	400.68	435.48	393.24	435.56	442.9	396.24	503.81	464.4	456.78	459.86	402.84	274.83	413.51	378.69	357.1	442.04	445.52	444.39	461.35	436.81	463.21	442.6	465.7	459.47	457.88	467.93	470.78	448.1	460.63	449.63	456.3	454.3	425.43
	610	429.8	475.74	298.4	92980	473.8	9794.6	296729	391.07	425.27	78047.4	422.23	438.65	414.94	411.44	366.19	385.42	422.8	384.31	420.27	412.96	380.42	487.47	445.56	436.32	436.98	388.07	262.22	397.33	359.69	342.34	417.45	428.9	424.69	436.91	417.59	439.7	424.59	436.35	436.51	430.39	450.91	453.44	434.04	436.57	433.43	427.15	432.96	398.78
	610	471.73	510.67	336.14	103771	506.89	10564.4	319287	414.57	451.17	82399.8	453.23	462.68	442.64	440.85	389.55	406.64	450.49	404.83	459.01	444.22	405.84	518.13	472.99	466.35	468.16	417.07	277.91	427.48	389.59	361.92	443.93	459.72	450.2	465.68	441.72	467.82	449.99	467.65	466.18	450.73	475.64	474.71	459.5	469.64	454.67	449.41	464.06	425.91
Mean		456.372	496.539	315.011	97035.1	471.318	10401.1	310128	403.493	440.613	83027.2	452.718	465.214	438.549	412.67	384.865	408.53	442.578	423.95	437.849	442.503	398.379	515.125	479.358	465.543	469.768	400.045	260.498	414.913	377.76	350.019	448.769	455.348	451.589	466.674	448.5	473.701	456.226	473.233	467.743	466.664	482.332	483.71	462.85	475.057	464.952	463.798	466.034	416.353
1 SD		26.3543	30.6143	21.0233	5545.18	29.53	558.626	16775.6	23.1427	22.6314	4619.26	24.3947	24.0758	22.2902	27.9413	20.0038	22.8132	22.9324	33.8624	22.8969	24.2121	19.3658	26.5367	26.1657	25.3995	23.4771	22.7175	17.1593	20.9223	19.9975	19.742	23.9339	23.6753	23.2444	23.539	23.615	26.0267	24.7258	27.5496	24.774	26.7382	25.8527	26.0178	24.1545	26.5228	24.8747	25.2102	24.4465	22.226
RSD		5.77473	6.16553	6.67383	5.71461	6.2654	5.37084	5.40924	5.73559	5.13636	5.56355	5.38848	5.17521	5.0827	6.77085	5.19761	5.58423	5.18155	7.98735	5.22941	5.47162	4.86116	5.15151	5.45848	5.4559	4.9976	5.67873	6.58712	5.04258	5.2937	5.64029	5.33323	5.19938	5.14724	5.04398	5.26533	5.49432	5.41964	5.82156	5.2965	5.72963	5.35994	5.37879	5.21864	5.58308	5.34995	5.4356	5.24564	5.33826
Reference value		468	476	350	99419.4	432	10323.5	325267	413	464	81428.6	455	452	450	408	444	410	458.7	441	460	433	425.7	515.5	462	448	465	417	270	430	396	366	452	440	453	448	430	453	447	449	437	437	449	455	435	450	439	435	446	444
Relative deviation (%)		2.48451	-4.31502	9.99686	2.39819	-9.10139	-0.751265	4.65433	2.30194	5.04041	-1.96326	0.501429	-2.92345	2.54456	-1.14461	13.3186	0.358537	3.51472	3.86621	4.81554	-2.1948	6.41778	0.0726479	-3.75714	-3.91574	-1.02538	4.06595	3.51944	3.5086	4.60606	4.36653	0.714823	-3.4883	0.311479	-4.16842	-4.30221	-4.56976	-2.06387	-5.3971	-7.03501	-6.78822	-7.42361	-6.30989	-6.4023	-5.56822	-5.91162	-6.62034	-4.49204	6.2268
IGGCAS-SKLLE (n=10)	ARM-1	531.67	510.13	487.77	34640.5	23301.4	72031.7	282922	1144.98	26246.7	36341.9	428.85	5844.86	573.53	458.37	314.1	491.96	479.57	446.17	555.43	482.35	479.35	456.81	440.43	430.52	465.04	484.34	479.04	585.39	525.82	466.68	1994.19	443.68	439.09	423.15	433.77	449.72	448.68	440.94	426.62	441.07	439.45	450.65	415.67	456.35	435.43	450.86	445.12	441.24
	ARM-1	510.29	469	483.02	33088.7	22832.3	70702.4	271643	1150.86	25835.2	36725.3	428.15	5949.86	575.64	446.37	314.15	497.57	478.85	443.88	549.61	484.14	491.65	468.35	460.1	439.1	471.74	491.78	451.92	587.33	529.55	476.71	2029.88	458.49	439.96	432.96	437.2	462.31	456.99	444.23	438.4	451.57	454.87	466.93	426.18	459.5	450.31	456.99	454.8	453.98
	ARM-1	509.32	471	470.72	32675.4	23200.5	70641.6	273818	1116.4	26528.8	35792.1	435.91	5758.59	577.29	464.08	305.46	514.09	462.62	456.55	599.61	504.7	486.55	466.78	450.16	434.27	463.88	476.8	462.82	595.99	536.76	473.27	2042.52	456.56	442.63	430.78	433.94	476.85	461.99	445.86	431.93	462.55	452.23	466.41	424.76	458.22	444.7	452.67	453.01	468.22
	ARM-1	513.67	475.86	446.95	33152.5	22876.4	72034.6	272667	1151.59	26036.1	36549.4	432.9	5874.69	575.01	493.76	311.35	495.79	478.72	451.2	554.7	494.51	491.42	465.19	448.16	447.03	478.31	492.49	461.76	616.67	539.67	473.85	2065.73	455.08	452.35	429.49	450.09	466.5	459.74	448.73	442.23	457.04	454.27	470.05	427.61	467.21	453.43	463.6	467.63	459.47
	ARM-1	508.91	462.18	441.72	32765.6	22268.6	68644.3	268791	1173.1	25834.6	36385.8	417.98	5956.2	580.38	463.18	309.93	494.77	469.26	438.62	537.88	487.06	481.01	468.81	449.63	436.23	471.9	493.28	460.34	590.22	531.73	476.87	2022.63	447.13	445.8	430.86	447.24	462.03	459.76	447.64	432.84	450.37	451.17	455.76	420.17	460.04	448.14	453.97	456.22	452.54
	ARM-1	507	471.5	447.21	32002	22917.6	69987.3	271038	1120.97	26053.4	36026.6	424.13	5854.57	573.93	450.9	308.68	496.67	476.68	450.73	549.87	490.52	492.23	474.19	451.83	445.51	476.25	485.29	457.51	592.57	544.55	481.97	2046.64	456.86	447.89	437.29	447.73	468.57	462.81	453.95	443.65	461.91	459.65	464.47	431.06	468.48	454.43	470.29	460.35	464.27
	ARM-1	492.62	458.36	442.76	31392.1	22087.4	68057.8	265504	1109.28	25066.2	35293.7	414.12	5783.76	564.23	446.76	301.95	485.5	460.93	434.38	557.92	480.37	481.29	453.28	439.46	427.38	467.94	475.22	470.87	586.07	523.56	471.68	2006.05	443.08	441.54	424.16	440.25	450.3	446.14	441.21	432.16	446.04	441.84	455.23	417.64	452.98	436.18	448.83	444.98	444.28
	ARM-1	499.08	463.51	457.43	32420.5	22564.9	70595.1	267708	1113.62	25850	36750.4	439.62	6024.08	574.13	496.63	310.82	500.29	475.37	442.58	544.75	492.24	486.18	475.74	459.27	444.75	483.31	487.58	451.99	588.25	541.35	477.04	2057.49	458.87	450.14	440.21	442	474.28	466.23	455.67	446.7	462.51	460.83	469.5	431.62	467.42	459.75	465.24	461.27	455.89
	ARM-1	513.62	474.37	463.86	33151.8	22567.3	70070	276975	1121.3	26234.6	35909.5	436.63	5947.11	583.49	486.76	310.18	499.63	482.49	442.36	573.28	486.99	491.25	474.17	457.14	443.73	484.99	491.85	456.44	588.26	535.92	480.78	2069.99	458.14	456.08	435.3	442.1	459.98	472.76	446.4	436.27	466.63	450.86	459.75	420.9	463.01	449.9	468.8	454.2	459.53
	ARM-1	508.84	464.89	475.81	32977.8	22327.3	69479.9	272151	1134.54	26021.6	36160.6	426.21	5826.35	582.38	453.27	306.92	492.79	460.48	451.4	552.56	493.39	488.73	461.05	446.06	430.95	467.57	487.43	447.2	599.69	533.44	475.59	2024.6	449.99	444.6	427.13	439.12	459.07	451.76	447.8	430.12	451.87	446.01	453.11	418.54	449.95	443.74	460.5	452.82	445.94
IGGCAS-FIL (n=10)	ARM-1	514.63	470.97	473	32910.7	23026.3	71135.9	274526	1116.48	25955.5	37118.3	431.96	6062.96	582.07	465.02	313.89	501.63	477.81	448.04	564.59	489.41	489.27	467.74	452.79	440.79	474.17	491.46	462.21	593.02	534.42	478.84	2044.81	459.94	441.53	434.95	434.43	464.96	456.98	442.92	439.01	453.22	453.94	462.54	428.28	457.19	455.39	462.41	460.21	450.9
	ARM-1	505.52	487.58	470.49	32894.9	22733.1	69584.8	271369	1097.96	25861.9	35899.2	420.04	5719.75	566.31	453.04	308.57	487.93	461.05	446.17	562.83	487.19	486.32	456.19	443.11	432.19	460.34	482.24	457.51	587.03	528.03	469.59	2001.98	445.18	433.63	417.92	438.72	449.05	451.99	444.34	430.69	451.83	443.41	462.72	419.74	447.19	437.28	449.17	446.39	472.9
	ARM-1	508.13	473.89	464.68	32871.1	22826.7	70685.9	273192	1164.45	26044.2	36023.6	429.59	5974.24	576.49	460.32	311.01	498.92	479.28	444.43	567.4	487.76	483.11	468	446.5	433.6	471.45	490.22	501.8	583.11	533.1	470.17	2023.1	460.25	445.47	435.87	439.08	467.06	452.79	444.05	432.93	449.24	449.63	462.17	418.09	466.85	444.54	457.98	451.49	442.81
	ARM-1	511.02	490.34	461.58	33085.4	23020	70620.2	275573	1131.02	26411	36356.6	431.81	5801.97	570.11	455.99	311.73	498.76	475.77	451.88	562.57	489.17	488.62	461.94	450.05	433.24	467.43	483.55	458.44	601.28	531.32	472.62	2042.27	445.46	441.22	429.96	439.64	461.48	457.52	444.48	431.46	447.86	444.96	452.98	426.38	465.84	438.56	448.88	456.25	452.16
	ARM-1	534.07	479.75	474.92	33793.4	23190.5	71899.1	276937	1178.35	26057.1	36383.9	427.68	5819.56	579.82	465.91	311.18	500.53	475.97	446.34	545.65	490.24	480.57	463.58	447.68	440.65	468.7	483.54	455.95	594.64	531.06	471.37	2005.47	448.59	445.51	424.87	438.42	462.28	456.39	445.71	433.86	451.38	452.24	464.35	420.44	457.97	447.94	456.95	451.67	453.42
	ARM-1	532.18	495.55	467.76	34736.7	23287.9	73101.8	285111	1151.66	27038.5	36423.7	435.21	5941.03	586.75	482.42	315.61	500.15	469.59	453.57	579.17	502.59	495.04	464.68	445.31	432.57	476.01	494.15	477.37	604.44	544.67	472.77	2044.19	451.15	444.85	428.83	438.08	459.46	455.38	437.92	433.16	442.75	446.13	454.18	418.33	453.11	439.41	446.22	449.63	456.44
	ARM-1	494.76	460.53	472.72	32673.2	23135.9	69842.8	269425	1110.7	25707	36165.8	427.46	5899.01	578.67	444.15	310.55	505.52	482.82	435.69	568.18	485.73	483.03	464.09	455.54	442.56	469.85	489.06	457.1	592.83	534.44	481.43	2054.91	456.45	444.71	429.64	445.19	470.28	459.07	451.42	437.13	462.11	452.72	468.48	432.52	463.16	458.1	464.21	463.86	453.23
	ARM-1	495.78	474.4	451.08	33152.5	22661.7	70883.3	269825	1132.88	25883.7	36777.2	426.73	5916.23	577.28	461.2	312.86	502.06	461.93	459.67	536.96	493.86	491.79	471.64	457.26	446.01	472.57	492.29	457.27	593.21	540.56	475.14	2050.98	458.08	447.88	442.39	448.83	467.58	466.45	456.14	442.85	468.5	465.06	473.71	429.44	468.83	455.8	465.61	461.13	452.08
	ARM-1	534.01	449.55	464.34	31060.4	21949.8	68292	260872	1152.5	24992.9	35126	417.8	5659.56	552.47	444.99	298.24	480.1	483.09	444.33	546.88	472.27	473.24	458.26	435.97	426.47	460.16	465.75	460.58	571.94	516.27	466.29	1961.34	442.43	433.31	416.53	429.11	449.38	451.2	444.58	425.84	442.61	436.39	451.34	413.03	458.36	434.02	449.44	442.86	450.01
	ARM-1	507.15	492.89	460.07	33211	22940.8	70628.7	277403	1145.06	26667.5	37045.1	434.43	5909.85	581.43	519.31	317	500.42	478.7	443.16	548.1	481.04	488.62	468.99	456.98	442.15	475.84	493.45	450.53	594.71	530.66	474.49	2059.08	455.43	457.64	435.97	447.69	466.87	459.82	451.6	441.14	466.72	459.96	469.5	431.99	462.05	451.79	470.44	457.98	463.19
Mean		511.614	474.812	463.895	32932.8	22785.8	70446	272872	1135.88	26016.3	36262.7	428.361	5876.21	575.571	465.621	310.209	497.254	473.549	446.558	557.897	488.777	486.464	465.474	449.672	437.485	471.373	486.589	461.933	592.333	533.344	474.357	2032.39	452.542	444.791	430.413	440.632	462.401	457.723	446.78	435.45	454.389	450.781	461.692	423.619	460.185	446.942	458.153	454.593	454.625
1 SD		12.5947	14.5234	12.9693	869.299	392.125	1279.36	5554.47	22.5586	468.851	515.848	6.88601	101.855	7.79754	20.1406	4.48488	7.32384	8.02706	6.51026	14.997	7.35154	5.48547	6.24184	6.82761	6.50064	6.6725	7.32407	12.3844	9.11384	7.02021	4.45958	27.6409	6.2595	6.28416	6.82487	5.71739	8.02471	6.4596	4.9156	5.77305	8.56751	7.48392	7.12507	6.05044	6.29874	8.07624	7.89053	6.72961	8.25483
RSD		2.46177	3.05878	2.79575	2.63961	1.72092	1.81608	2.03556	1.986	1.80214	1.42253	1.60753	1.73334	1.35475	4.32552	1.44576	1.47286	1.69508	1.45788	2.68813	1.50407	1.12762	1.34096	1.51836	1.48591	1.41555	1.50519	2.68099	1.53864	1.31626	0.940131	1.36002	1.38319	1.41283	1.58566	1.29754	1.73545	1.41125	1.10023	1.32577	1.8855	1.66021	1.54325	1.42827	1.36874	1.807	1.72225	1.48036	1.81574
Reference value		511	475	463	32867.7	22680	70411.8	272533	1135.21	25609.1	36713.8	428	5880	575	463	309.859	479	473	446	558	489	486	465	449	437	471	486	463	592	533	474	2030	452	444	430	440	462	457	446	435	453	450	461	423	460	446	457	454	454
Relative deviation (%)		-0.120059	0.0394737	-0.193197	-0.197979	-0.466559	-0.0485633	-0.124437	-0.0593486	-1.5902	1.22859	-0.084229	0.0644303	-0.0992174	-0.566199	-0.112905	-3.81086	-0.116068	-0.125	0.0184588	0.0457055	-0.0953704	-0.101935	-0.149555	-0.110984	-0.079087	-0.121091	0.230562	-0.0561655	-0.0645403	-0.0754219	-0.117857	-0.119912	-0.178266	-0.0960465	-0.143523	-0.0866883	-0.158096	-0.174776	-0.103333	-0.306623	-0.173556	-0.15	-0.146454	-0.0403261	-0.211211	-0.252298	-0.130727	-0.137665
IGGCAS-SKLLE (n=10)	BCR-2G	8.25			25213.8	22811.1	74040.4	267699	1641.37	15521.8	50298.4	30.94	13492.3	410.9	16.73	1430.87	39.32	11.7	19.34	142.31	23.74	48.49	323.01	31.66	172.45	11.79	259.57		2.29		1.26	660.02	23.8	49.94	7.15	28.44	6.14	1.79	6.74	1	6.09	1.19	3.64	0.443	2.96	0.452	5.02
	BCR-2G	9.66			24249.8	22247.5	72533	257808	1542.97	15227.4	51262.2	31.4	13632.6	415.93	16.02	1437.34	39.75	15.05	18.99	136.1	23.52	47.46	330.77	33.08	175.69	11.84	258.41		2.87		1.07	672.37	24.8	51.34	6.61	28.59	6.02	1.95	6.66	1.07	6.29	1.23	3.31	0.581	3.45	0.455	5.06
	BCR-2G	8.33			24248.2	22106.2	73152.3	255563	1594.11	15109.6	50792	30.81	13814.8	417.62	14.7	1436.51	39.28	9.86	18.47	140.95	23.2	48.58	330.48	33.36	178.69	11.98	257.38		2.49		1.28	680.1	25	50.69	6.82	28.58	6.41	1.87	6.1	1.02	6.29	1.23	3.83	0.432	3.68	0.489	4.41
	BCR-2G	8.72			23678.5	21716.2	71313.1	253190	1544.25	15062.2	51763.7	31.49	13616.8	420.73	16.87	1432.36	40.39	11.3	19.55	127.17	23.93	47.99	336.65	32.55	175.89	12.07	265.02		2.54		1.06	681.61	25.16	52.26	7.04	27.9	6.92	1.76	6.46	1	6.21	1.3	3.81	0.553	3.34	0.449	4.62
	BCR-2G	8.05			23086.5	21116	69379.7	245020	1418.78	15615.8	48850.9	30.46	13205.9	409.59	16.54	1402.65	38.44	13.49	20.87	131.25	22.56	47.76	324.17	31.72	178.01	11.57	255.26		2.43		1.26	660.01	23.87	51.55	6.37	27.35	6.28	1.8	6.46	0.56	6.08	1.26	3.73	0.47	3.36	0.404	4.66
	BCR-2G	10.49			23282.6	21951.2	71648.2	253980	1530.15	15126.9	51853.7	31.56	13662.2	426.8	17.5	1447.49	40.52	14.71	18.92	135.29	25.48	49.2	344.77	33.47	180.29	12.49	263.69		2.79		1.12	696.39	25.38	53.43	6.68	27.36	6.69	1.98	6.93	1.08	6.5	1.27	3.43	0.506	3.17	0.431	5.7
	BCR-2G	9.14			23589.5	21589.3	71335	252880	1457.26	15259.5	51105.8	30.39	13462.5	425.04	16.02	1436.74	39.13	12.16	20.58	131.51	23.61	46.92	327.97	32.41	172.41	12.01	257.37		2.3		1.11	666.69	24.7	51.73	6.72	26.97	6.28	1.94	6.07	1.03	6.32	1.18	3.41	0.469	3.6	0.54	4.9
	BCR-2G	9.4			23981	21737.2	70180.6	259900	1532.05	15218.1	51160.2	30.38	13562.2	421.13	15	1440.04	40.06	12.36	18.45	146.53	24.23	47.4	338.43	32.59	173.75	12.01	265.21		2.52		1.25	674.28	24.13	50.73	6.87	29.47	6.29	1.95	6.64	0.91	5.78	1.19	3.64	0.397	3.53	0.395	4.82
	BCR-2G	10.03			23937.1	22176	72027	255051	1456.8	14993.2	51556.1	30.98	13411.9	418.61	19.47	1429.87	37.43	13.11	18.9	130.88	23.43	48.07	326.8	33.29	175.96	11.83	250.41		2.83		1.16	659.26	25.45	50.53	6.89	28.2	6.45	1.58	6.72	0.85	6.03	1.26	3.44	0.447	3.15	0.39	4.56
	BCR-2G	8			23815.4	21983.9	71596.3	257249	1564.67	15194	51454.1	30.26	13423.7	417.14	16.69	1419.1	39.03	13.9	19.08	128.22	22.55	46.62	331.77	32.74	178.74	11.68	264		2.66		1.22	661.72	24.81	51.17	6.74	27.89	7.12	1.89	6.16	0.96	5.98	1.16	3.29	0.492	3.36	0.482	4.96
IGGCAS-FIL (n=10)	BCR-2G	8.13			24379.4	22336.8	72365.7	266855	1513.88	15138.4	51806.5	31.64	13722.7	424.24	11.85	1437.51	40.02	11.51	19.66	123.02	24.1	47.3	330.91	32.98	175.88	11.95	263.49		2.41		1.15	659.44	25.14	52.16	6.66	29.14	6.45	1.73	5.92	1.02	6.47	1.27	3.54	0.519	2.95	0.56	4.73
	BCR-2G	8.43			24466.5	22482.4	74201	260026	1578.76	15032.4	52301.8	30.77	13723.7	428.72	17.14	1459.92	38.06	13.09	17.07	131.72	24.78	46.89	340.29	34.01	180.78	12.07	263.01		2.87		1.25	675.3	25.51	51.63	6.78	29.56	6.52	1.87	6.9	1.06	6.06	1.23	3.82	0.522	3.21	0.431	5.17
	BCR-2G	10.03			24156.7	22201.8	73509.9	256590	1567.25	15123.3	53120	31.96	14038.8	429.34	15.38	1468.38	41.03	14.12	18.55	127.43	24.22	48.1	338.63	33.82	181.84	12.13	266.76		2.54		1.198	686.06	25.44	52.98	7.06	28.62	6.62	1.76	6.91	0.928	6.5	1.317	3.8	0.488	3.52	0.515	4.87
	BCR-2G	10.1			23652.8	21894.4	72588.1	264498	1497.29	14928.1	51512.8	30.75	13884.8	425.27	15.76	1442.05	41.71	14.4	18.57	134.76	24.39	47.93	332.97	33.62	181.66	12.36	268.99		2.61		1.256	678.14	25.31	53.06	7.03	28.06	6.49	2.1	6.24	1.016	7.11	1.245	3.4	0.525	3.62	0.539	5.04
	BCR-2G	10.55			23388.7	22019.2	71573.6	256758	1481.68	15036.5	50081.2	30.22	13816	419.57	15.37	1425.86	39.15	15.07	18.74	126	23.77	47.15	327.71	32.63	175.43	11.65	259.22		2.71		1.19	674.25	24.76	51.25	6.46	27.61	6.26	1.93	7.21	0.983	6.25	1.365	3.49	0.477	2.96	0.508	4.99
	BCR-2G	10.44			23464.9	21399.6	71843.1	251685	1492.17	14825.3	48809.5	30.24	13385.3	409.11	17.56	1413.6	38.1	10.88	18.98	126.35	23.76	47.78	327.03	32.64	173.42	11.9	260.99		2.74		1.07	658.29	24.3	50.37	6.72	27.23	6.31	1.9	6.49	0.991	5.79	1.222	3.48	0.501	3.68	0.455	5.19
	BCR-2G	9.13			23672.6	21948.6	71576.6	257544	1523.65	14887	49917.8	30.96	13361.9	416.66	14.15	1424.75	38.5	11.8	19.73	131.4	23.82	46.9	326.27	32.9	174.96	11.56	260.96		2.19		1.175	664.58	24.62	50.92	6.74	29.08	6.51	1.83	6.45	1.023	6.31	1.247	3.64	0.495	3.23	0.455	4.76
	BCR-2G	9.69			23844.3	21808.1	70233.4	255026	1493.92	15297.2	48741.6	30.85	13353.6	422.64	16.67	1414.03	38.97	12.89	19.34	134.4	23.65	46.9	328.66	32.34	173.21	11.08	265.08		2.4		1.136	663.14	24.7	50.84	6.44	28.57	6.24	1.74	6.26	0.927	6.26	1.3	3.59	0.497	3.51	0.509	4.54
	BCR-2G	8.4			24378.6	22110.1	71623.4	258365	1572.84	15074.7	49199.8	30.53	13308.5	420.95	14.76	1449.67	39.31	11.75	18.8	127.66	23.92	49.19	327.19	32.58	175.32	11.68	261.42		2.57		1.189	661.55	25.23	50.75	6.74	27.79	6.27	1.91	6.67	1.047	6.39	1.211	3.47	0.441	3.83	0.484	4.49
	BCR-2G	8.88			23693.6	21618.9	69840.1	257510	1481.19	14785.7	47576.8	30.97	13277.6	411.95	16.9	1598.38	38.63	13.15	18.92	131.09	21.88	46.45	325.25	31.48	169.98	11.15	258.1		2.77		1.364	648.41	24.36	49.84	6.53	26.81	6.63	1.82	6.39	1.06	6.09	1.23	3.3	0.478	3.24	0.453	5.1
Mean		9.1925			23909	21962.7	71828	257160	1524.25	15122.9	50658.2	30.878	13557.9	419.597	16.054	1442.36	39.3415	12.815	19.0755	132.202	23.727	47.654	330.986	32.7935	176.218	11.84	261.217		2.5765		1.1884	669.08	24.8235	51.3585	6.7525	28.161	6.445	1.855	6.519	0.97675	6.24	1.24535	3.553	0.48665	3.3675	0.4698	4.8795
1 SD		0.883878			493.452	383.317	1307.45	5182.71	53.7391	206.583	1427.68	0.509402	226.258	6.09294	1.5727	39.8982	1.05827	1.45671	0.801791	5.9247	0.792525	0.799792	5.91779	0.691476	3.31229	0.345711	4.3828		0.201815		0.080553	11.6245	0.523312	1.00581	0.213489	0.804376	0.261222	0.113532	0.33482	0.114493	0.291457	0.0499582	0.1793	0.0430425	0.25725	0.0484514	0.303063
RSD		9.61521			2.06387	1.74531	1.82024	2.01536	3.5256	1.36603	2.81826	1.64973	1.66883	1.45209	9.79633	2.76618	2.68995	11.3672	4.20325	4.48155	3.34018	1.67833	1.78793	2.10858	1.87966	2.91985	1.67784		7.8329		6.77827	1.73739	2.10813	1.95841	3.16163	2.85635	4.05309	6.12031	5.13606	11.7219	4.67079	4.01158	5.04643	8.84466	7.6392	10.3132	6.21094
Reference value		9			23964.5	21360	70941.2	253867	1615.49	14900	50428.6	33	14100	425	17	1550	38	13	21	125	23	47	342	35	184	12.5	270		2.6		1.16	683	24.7	53.3	6.7	28.9	6.59	1.97	6.71	1.02	6.44	1.27	3.7	0.51	3.39	0.503	4.84
Relative deviation (%)		-2.13889			0.231564	-2.82178	-1.25011	-1.29721	5.64787	-1.49565	-0.455443	6.4303	3.84485	1.27129	5.56471	6.94477	-3.53026	1.42308	9.16429	-5.7616	-3.16087	-1.39149	3.22032	6.30429	4.22935	5.28	3.25296		0.903846		-2.44828	2.03799	-0.5	3.64259	-0.783582	2.55709	2.2003	5.83756	2.8465	4.2402	3.10559	1.94094	3.97297	4.57843	0.663717	6.6004	-0.816116
SD, standard deviation; RSD, relative standard deviation.
[truncated: 3 more columns]
