# Supplementary material for: High-precision EPMA measurement of trace elements in ilmenite and reference material development
Source: Royal Society of Chemistry journal article supplement (doi:10.1039/d2ja00238h), 2022-01-01
Supplement: d2ja00238h5.xlsx [file d2ja00238h5.xlsx]

## Sheet: Sheet1
Supplementary Table S3. Major（wt.%）and trace element (μg/g) mass fractions of the PZH12-09 ilmenite determined using SM ICP-MS.
Comment	MnO	MgO	FeO	TiO2	Al	Sc	V	Cr	Co	Ni	Zr	Nb	Hf	Ta
PZH12-09-1	0.542018	6.73511	37.0856	49.9008	987.07	34.9	244	17.8	99.6	25.1	84.5	30.5	2.08	2.75
PZH12-09-2	0.550407	6.78809	37.3144	49.5824	1034.84	34	235	27.6	90.4	29.5	82.2	29.1	2.02	2.66
PZH12-09-3	0.540202	6.81058	37.7037	50.1645	901.34	34.5	231	21.9	95.37	27.6	85.3	30.1	2.35	2.79
Mean	0.544209	6.77793	37.3679	49.8826	974.418	34.4667	236.667	22.4333	95.1233	27.4	84	29.9	2.15	2.73333
1 SD	0.00544431	0.0387487	0.312492	0.291467	67.6453	0.450925	6.65833	4.92172	4.60496	2.20681	1.60935	0.72111	0.175784	0.0665833
SD, standard deviation.
