# Supplementary material for: High-precision EPMA measurement of trace elements in ilmenite and reference material development
Source: Royal Society of Chemistry journal article supplement (doi:10.1039/d2ja00238h), 2022-01-01
Supplement: d2ja00238h6.xlsx [file d2ja00238h6.xlsx]

## Sheet: Sheet1
Supplemental Table S4. Major and trace element composition (μg/g) of the PZH12-09 ilmenite using high-precision EPMA method.
Comment	Mg	Sc	Zr	Nb	Ti	Fe	Mn	Co	Ni	Cr	V
PZH-1-Core	42895	35	88	28	309224	299952	4103	125	26	26	246
PZH-1-Rim	43239	32	88	22	308284	298543	4125	86	24	25	252
PZH-2-Core	43373	44	84	29	310180	297917	4098	111	26	25	235
PZH-2-Rim	41005	37	92	39	305975	308295	3987	71	28	33	238
PZH-3-Core	40913	37	79	26	303951	306794	3980	97	22	27	251
PZH-3-Rim	40750	30	89	27	303193	308844	3988	77	20	31	279
PZH-4-Core	41340	39	97	26	306230	306724	4002	81	18	27	217
PZH-4-Rim	41974	35	62	27	304626	306024	4006	107	20	23	210
PZH-5-Core	40148	34	94	23	309613	307374	3956	72	21	23	264
PZH-5-Rim	40259	31	87	26	307178	307299	4015	66	22	14	209
PZH-6-Core	40657	42	69	32	308683	307286	4030	81	22	29	259
PZH-6-Rim	40392	36	102	34	308969	309180	3969	82	24	25	240
PZH-7-Core	40597	38	99	31	308759	304897	3998	79	25	25	227
PZH-7-Rim	40767	37	109	28	300822	308671	3947	90	19	20	222
PZH-8-Core	41162	32	101	22	300033	308938	3853	77	20	22	254
PZH-8-Rim	41471	45	97	26	304382	306802	3893	85	23	23	230
PZH-9-Core	41402	41	80	24	305808	303432	4066	82	26	25	304
PZH-9-Rim	41624	31	107	21	309340	306755	3892	112	21	23	242
PZH-10-Core	42013	35	93	37	307620	298672	3941	107	21	31	286
PZH-10-Rim	42522	41	100	32	307596	297356	3924	93	29	27	224
PZH-11-Core	42265	39	83	26	308180	297925	3963	96	27	18	254
PZH-11-Rim	43547	36	82	33	306321	295041	3955	97	25	22	266
PZH-12-Core	44474	39	83	32	309107	293238	3996	99	20	26	235
PZH-12-Rim	43628	36	106	24	306183	292748	3887	110	20	26	184
PZH-13-Core	43795	33	103	33	305891	293705	3914	105	30	37	219
PZH-13-Rim	43842	38	98	29	305016	293672	3892	101	19	22	202
PZH-14-Core	43659	30	90	29	301721	295339	3963	83	28	23	208
PZH-14-Rim	43861	38	71	30	304903	291117	3960	103	25	20	216
PZH-15-Core	43079	35	66	24	302190	291860	3957	92	19	21	265
PZH-15-Rim	40286	39	89	32	303113	299689	3977	94	25	18	291
PZH-16-Core	40303	37	99	25	306446	298779	4014	111	25	28	231
PZH-16-Rim	40070	37	104	29	306103	299071	4068	95	29	21	273
PZH-17-Core	40795	33	106	28	307770	296242	4093	87	26	29	259
PZH-17-Rim	42082	36	97	29	304377	300282	4028	90	28	30	223
PZH-18-Core	41977	38	96	26	303788	301137	3989	87	23	19	224
PZH-18-Rim	42543	32	84	25	304143	298823	4044	96	29	15	275
PZH-19-Core	42253	33	93	25	305303	301050	4080	95	20	17	273
PZH-19-Rim	43465	33	76	25	309289	290647	4056	101	25	21	203
PZH-20-Core	44478	35	89	21	309684	291008	4087	91	27	12	277
PZH-20-Rim	42984	42	98	23	303306	297343	3893	86	27	17	256
Mean	42047.2	36.275	90.75	27.7	306082	300462	3989.72	92.5	23.85	23.65	243.075
1 SD	1342.02	3.70715	11.562	4.22568	2634.26	5945.73	68.4982	12.8303	3.41603	5.27476	27.8221
RSD	3.19171	10.2196	12.7405	15.2552	0.860636	1.97886	1.71686	13.8705	14.323	22.3034	11.4459
Information value	40765.3	34.4862	83.2327	30.2974	315225	293924	3930.38	97.2047	21.5681	27.1421	233.826
Relative deviation (%)	-3.14476	-5.18691	-9.03173	8.57294	2.90032	-2.22445	-1.50995	4.83999	-10.5802	12.866	-3.95531
